# Supplementary material
Source: publisher figshare collection journal article supplement (https://geolsoc.figshare.com/articles/dataset/_/3454145)

Fractional Crystallisation modelling using Ni7 as a parental magma

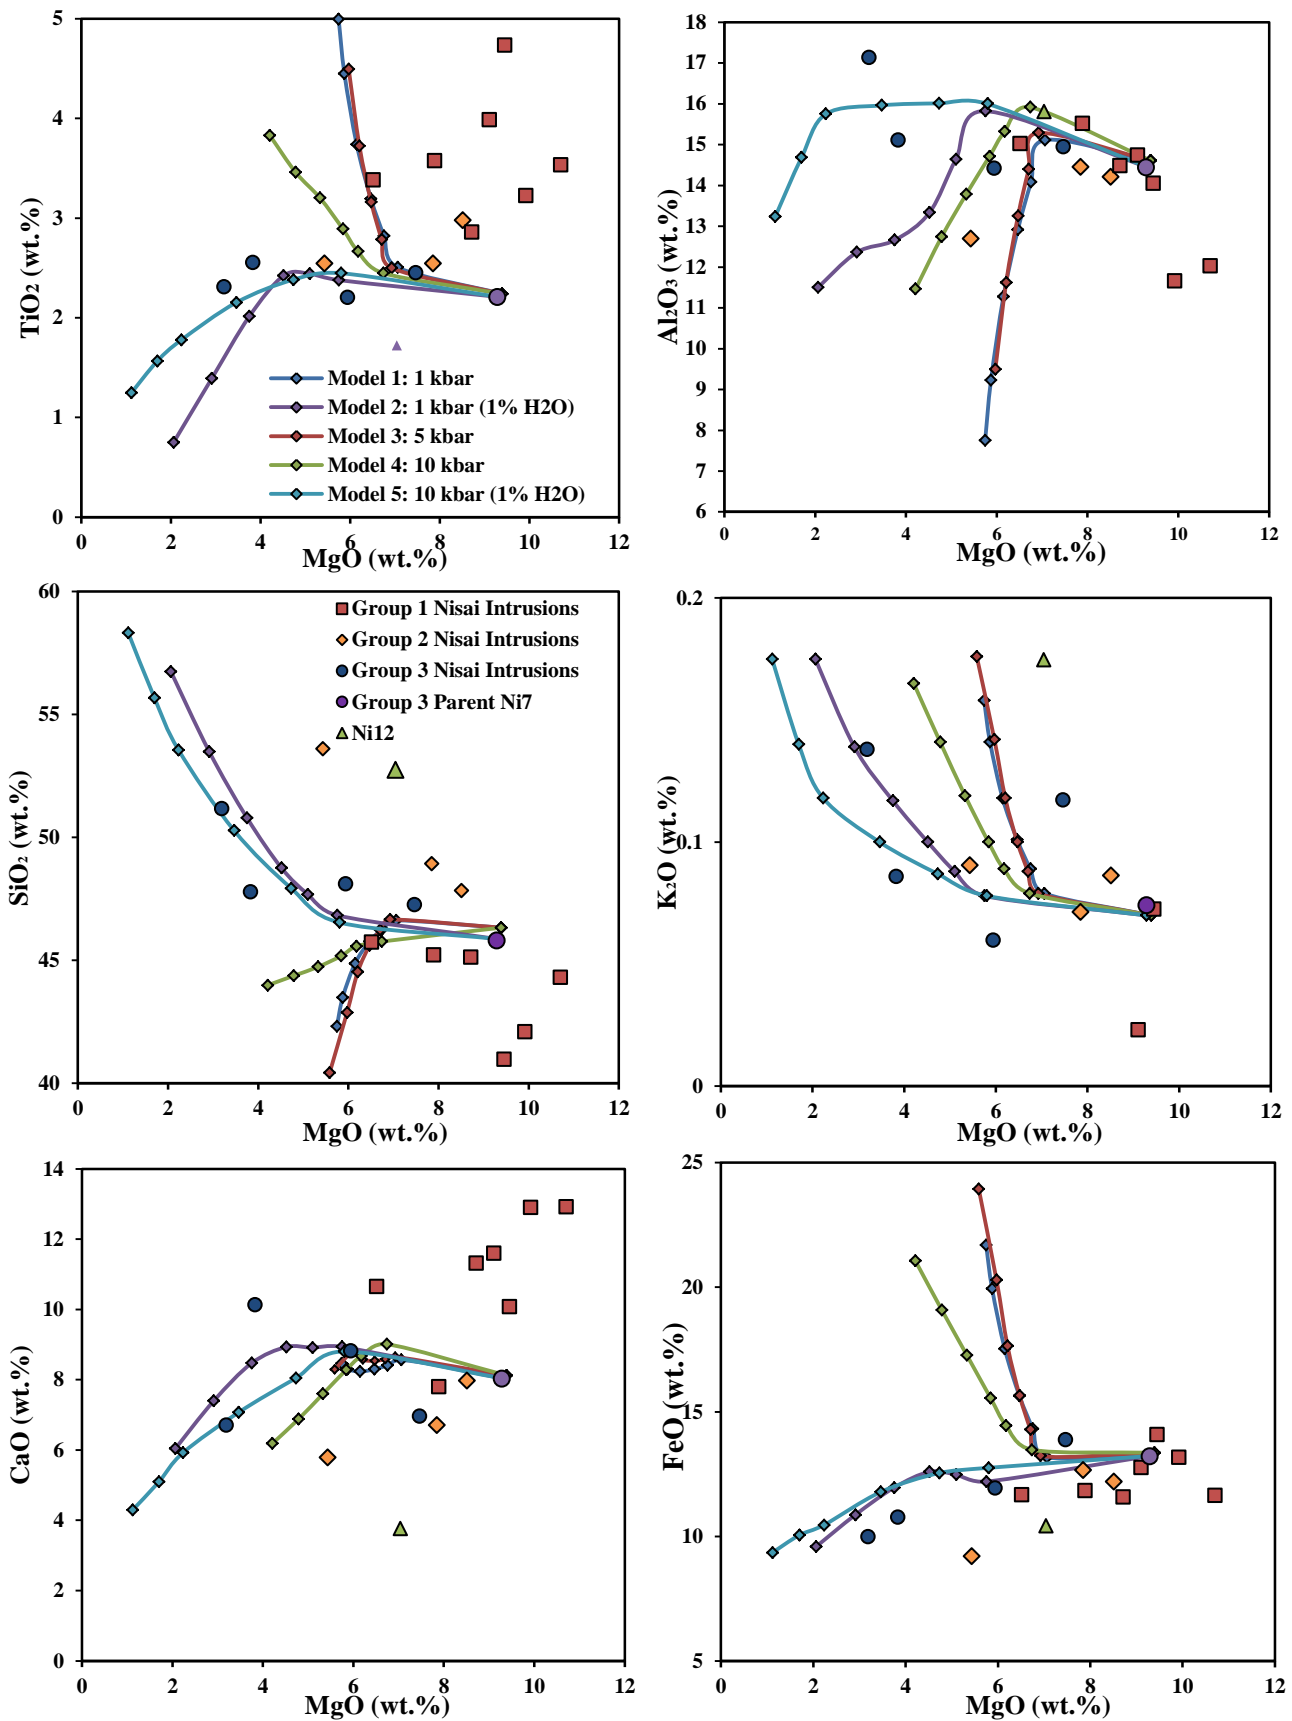

Fractional Crystallisation modelling using Ni10 as a parental magma

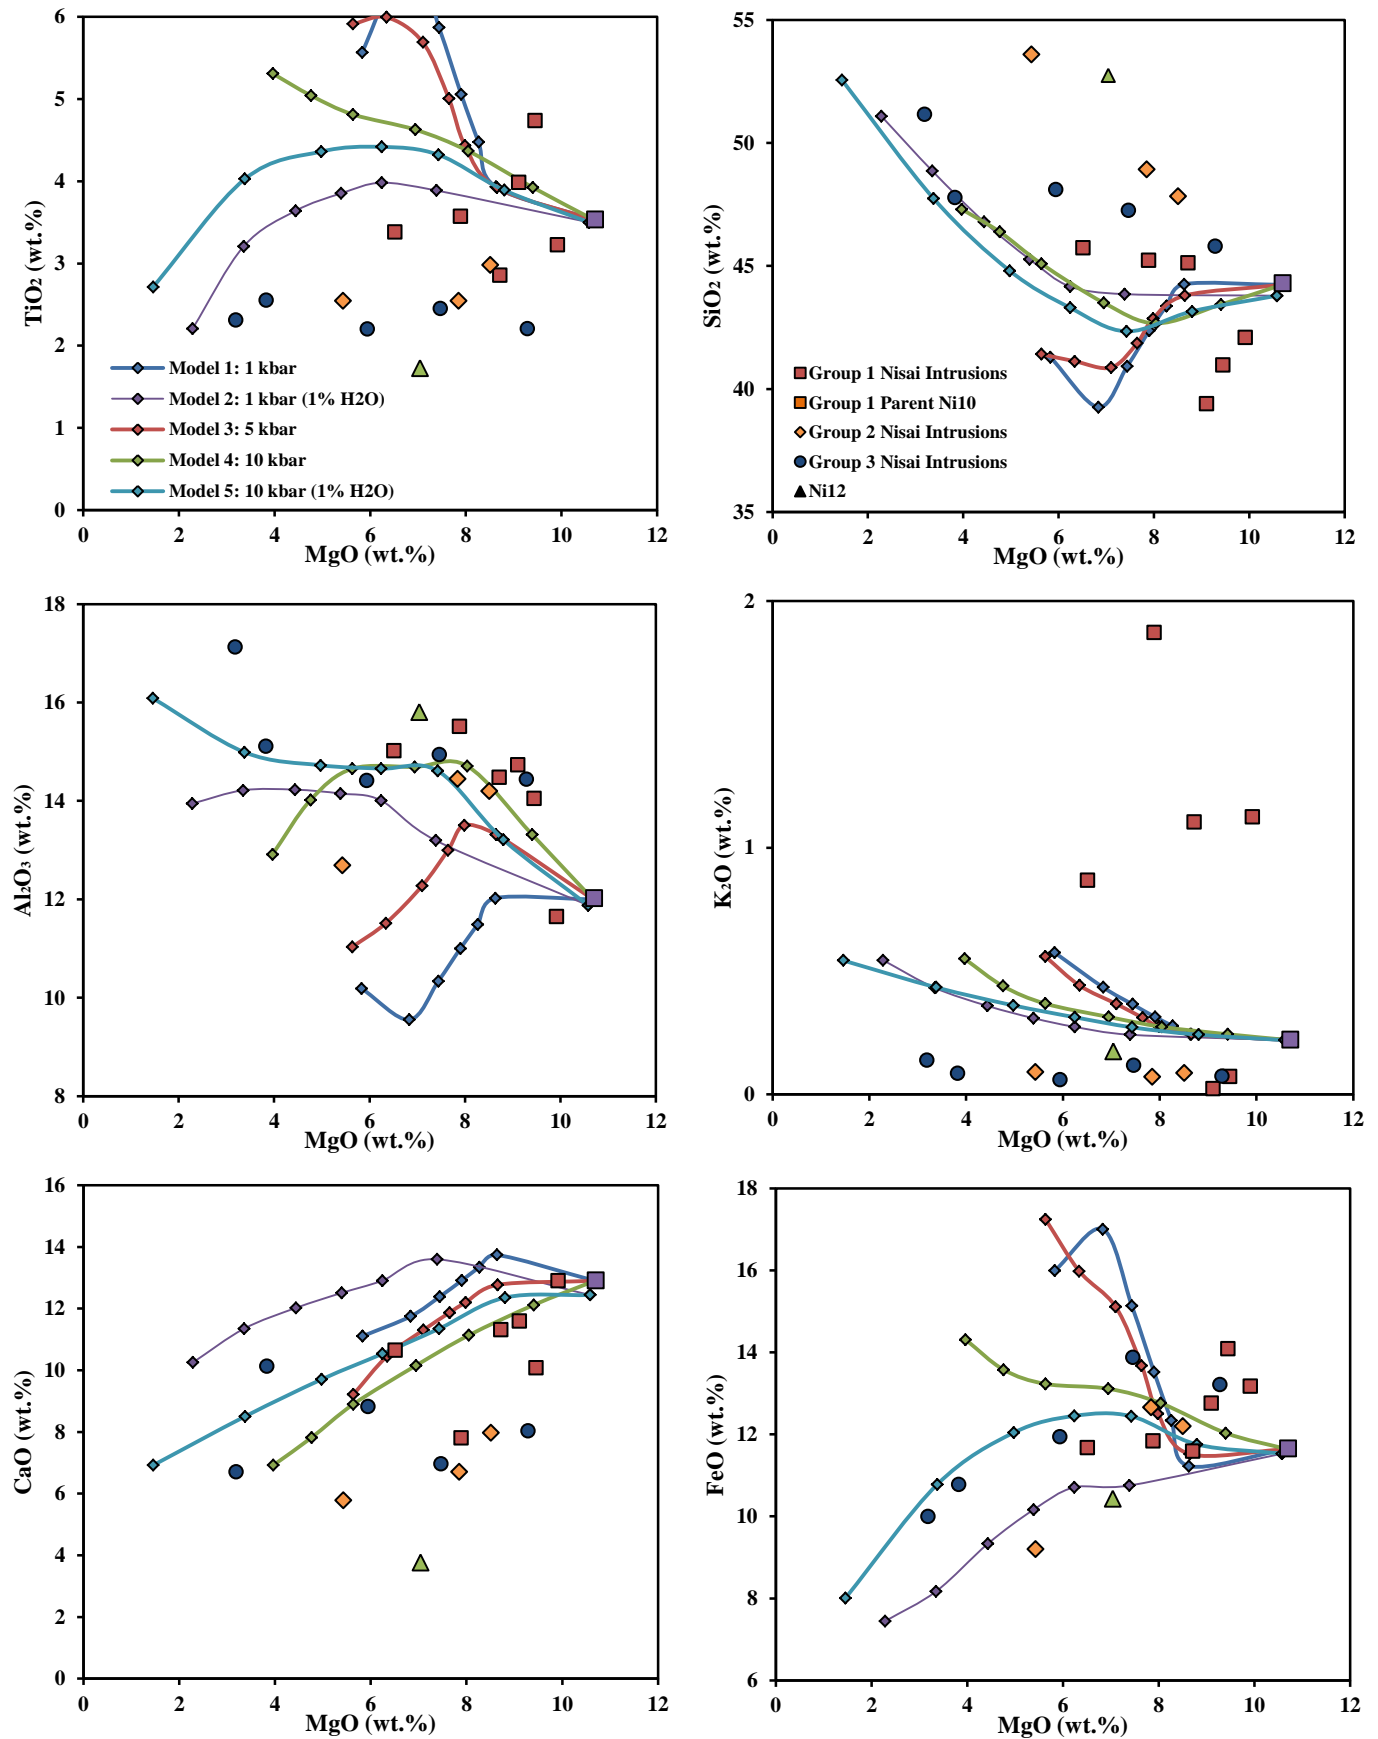

Supplement: Supplementary file 1 [file 1]
